# Supplementary material
Source: PubMed Central journal article supplement (PMC4175170)

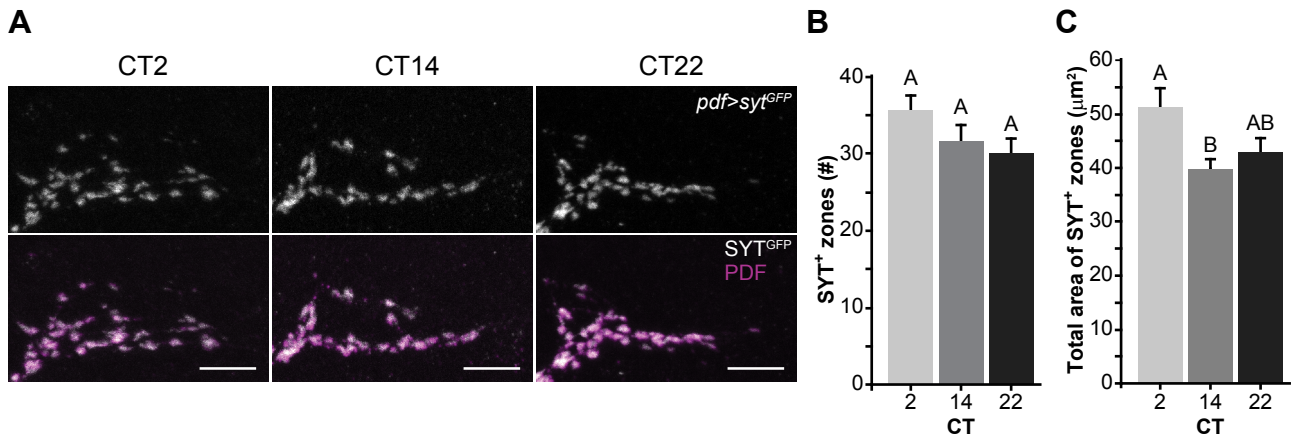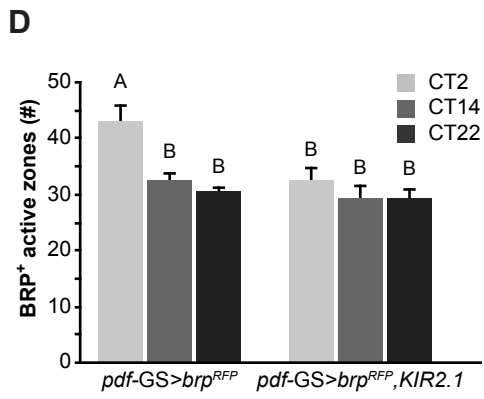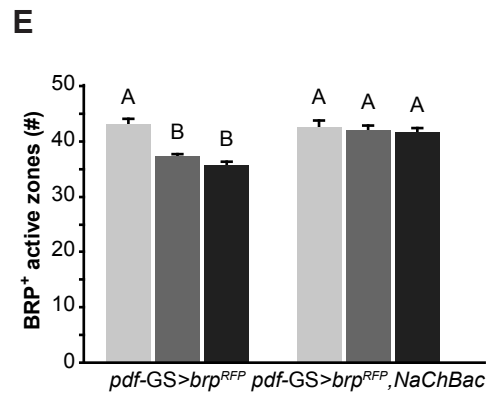

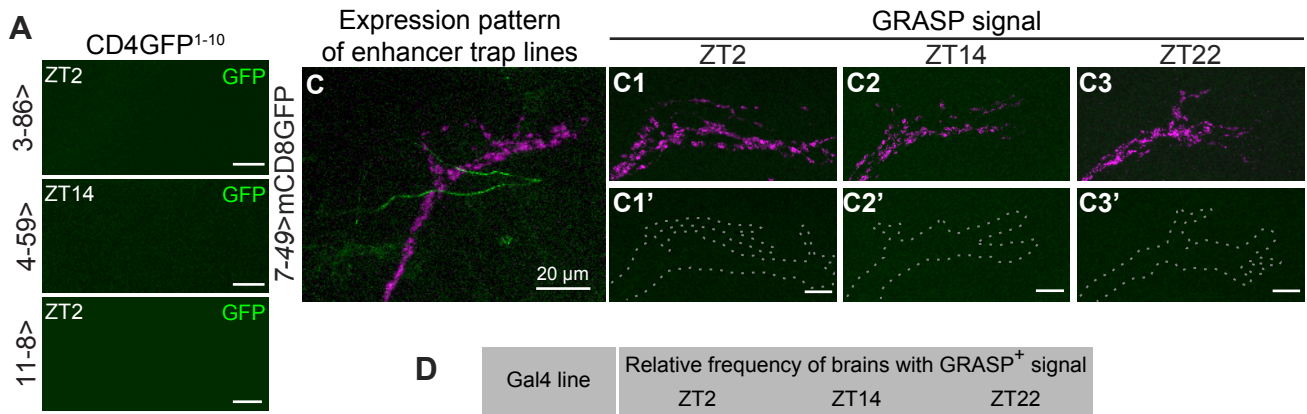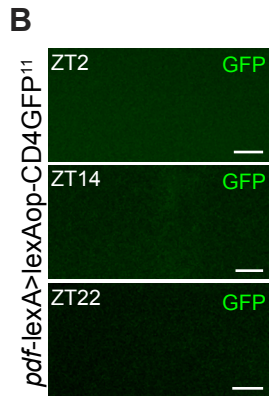

**D**

| Gal4 line | Relative frequency of brains with GRASP <sup>+</sup> signal |      |      |
|-----------|-------------------------------------------------------------|------|------|
|           | ZT2                                                         | ZT14 | ZT22 |
| 3-86      | 0.67                                                        | 0.00 | 0.00 |
| 4-12      | 0.60                                                        | 0.70 | 0.78 |
| 4-59      | 0.16                                                        | 0.69 | 0.11 |
| 4-93      | 0.90                                                        | 0.87 | 0.90 |
| 5-21      | 1.00                                                        | N.D. | 1.00 |
| 5-43      | 0.00                                                        | N.D. | 0.20 |
| 5-133     | 0.94                                                        | 0.93 | 0.94 |
| 7-49      | 0.06                                                        | 0.12 | 0.06 |
| 8-135     | 0.87                                                        | 0.90 | 0.13 |
| 11-8      | 0.92                                                        | 0.93 | 0.86 |

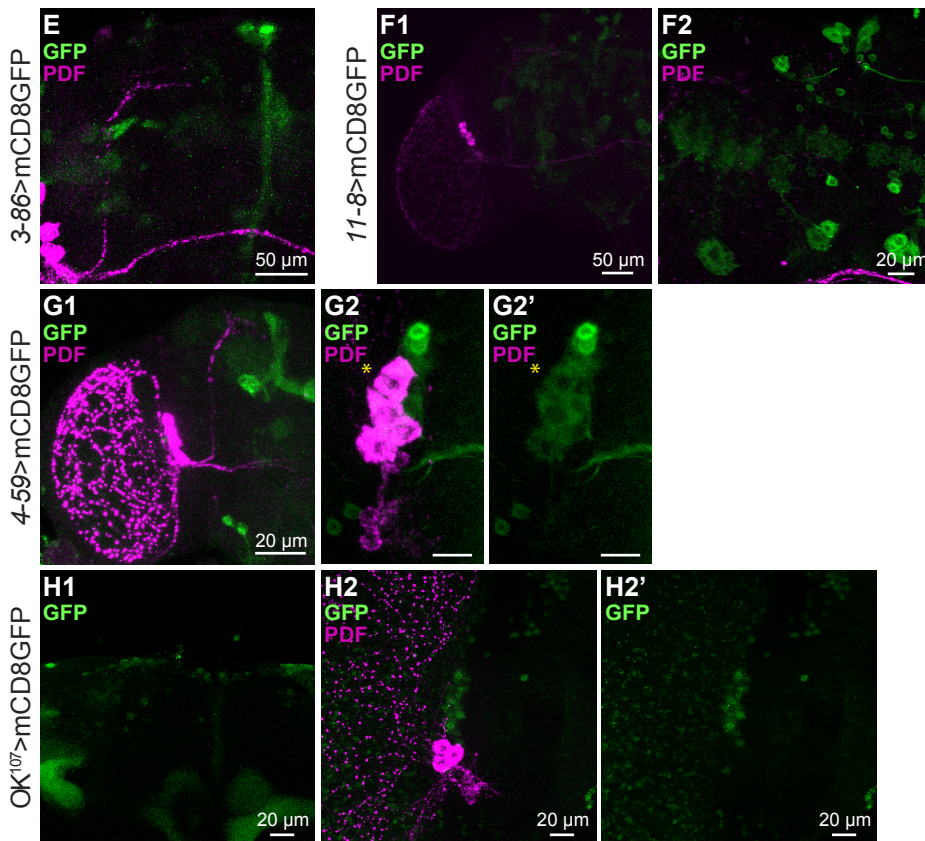

Supplement: NIHMS618590-supplement-01.pdf [file NIHMS618590-supplement-01.pdf]
